# Supplementary material
Source: MDPI journal article supplement (https://www.mdpi.com/2073-4441/13/13/1863)

**Figure S1:** Abiotic data of continental slope Potiguar Basin. a) Temperature (°C); b) Oxygen (mg/L); c) pH; d) Sedimentary organic matter (%); e) Chlorophyll-a (µg/L); f) Pheophytin-a (µg/L).

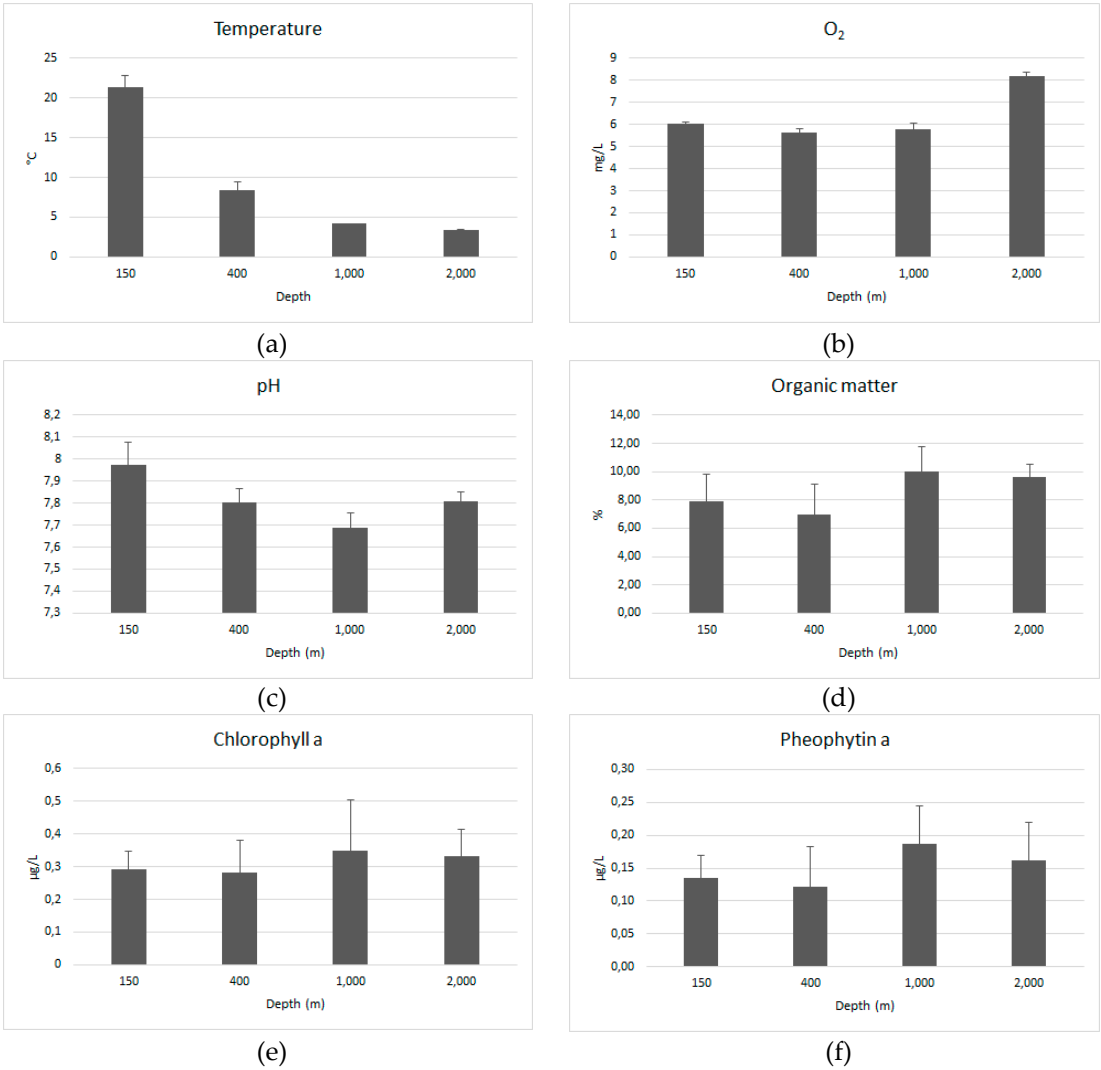

Supplement: s1 [file s1]
